# Supplementary material
Source: PubMed Central journal article supplement (PMC7241345)
Supplement: mmc1.pdf [file mmc1.pdf]

**Supplemental Table.** Post-test probability depending on the pre-test probability (i.e. disease prevalence) and the results of lung US (presence or absence of B-lines)

| Pre-test probability (%) | Post-test probability (%) after lung US |                              |
|--------------------------|-----------------------------------------|------------------------------|
|                          | Presence of bilateral B-lines           | Absence of bilateral B-lines |
| 5                        | 27.2                                    | 1.3                          |
| 10                       | 44.1                                    | 2.8                          |
| 25                       | 70.3                                    | 8.0                          |
| 50                       | 87.6                                    | 20.6                         |
| 75                       | 95.5                                    | 43.8                         |

*US* ultrasound
